# Supplementary material for: Transfluthrin eave-positioned targeted insecticide (EPTI) reduces human landing rate (HLR) of pyrethroid resistant and susceptible malaria vectors in a semi-field simulated peridomestic space
Source: Malar J. 2021 Aug 30;20:357. doi: 10.1186/s12936-021-03880-2 (PMC8404287; doi:10.1186/s12936-021-03880-2)
Supplement: Supplementary file 2 — Additional file 2. Dataset for the evaluation of EC EPTI against Ifakara strain, Mbita strain and Kingani strain that support the conclusion of this article. [file 12936_2021_3880_MOESM2_ESM.xlsx]

## Sheet: Ifakara_arabiensis
date	day	time	released	compartment	volunteer	intervention	recaptured	24-Mortality	Total		Temperature	Humidity	Wind
25.03.2018	1	1	80	1	2	0	25	3	52		30.8	66.6
	1	2	80	1	2	0	14	0
	1	3	80	1	2	0	8	1
	1	4	80	1	2	0	5	0
	1	1	80	2	3	1	10	3	27
	1	2	80	2	3	1	8	1
	1	3	80	2	3	1	6	2
	1	4	80	2	3	1	3	0
26.03.2018	2	1	80	1	3	0	11	1	41		29.2	76
	2	2	80	1	3	0	9	1
	2	3	80	1	3	0	13	0
	2	4	80	1	3	0	8	0
	2	1	80	2	2	1	5	1	13
	2	2	80	2	2	1	3	0
	2	3	80	2	2	1	2	0
	2	4	80	2	2	1	3	0
2018-04-02	3	1	80	1	1	0	21	1	48		30.4	67.4
	3	2	80	1	1	0	8	1
	3	3	80	1	1	0	18	0
	3	4	80	1	1	0	1	0
	3	1	80	2	4	1	15	1	29
	3	2	80	2	4	1	2	0
	3	3	80	2	4	1	11	2
	3	4	80	2	4	1	1	0
3.04.2018	4	1	80	1	4	0	16	0	46		25.4	92
	4	2	80	1	4	0	6	0
	4	3	80	1	4	0	14	0
	4	4	80	1	4	0	10	0
	4	1	80	2	1	1	21	4	38
	4	2	80	2	1	1	6	0
	4	3	80	2	1	1	6	4
	4	4	80	2	1	1	5	1
4.04.2018	5	1	80	1	2	1	29	1	43		27.6	81.3
	5	2	80	1	2	1	4	1
	5	3	80	1	2	1	9	0
	5	4	80	1	2	1	1	0
	5	1	80	2	3	0	19	1	60
	5	2	80	2	3	0	20	0
	5	3	80	2	3	0	6	2
	5	4	80	2	3	0	15	1
5.04.2018	6	1	80	1	3	1	6	3	9		28	80.5
	6	2	80	1	3	1	0	0
	6	3	80	1	3	1	1	1
	6	4	80	1	3	1	2	0
	6	1	80	2	2	0	30	1	52
	6	2	80	2	2	0	11	0
	6	3	80	2	2	0	5	0
	6	4	80	2	2	0	6	0
6.04.2018	7	1	80	1	1	1	6	2	18		29.5	80
	7	2	80	1	1	1	5	0
	7	3	80	1	1	1	2	0
	7	4	80	1	1	1	5	1
	7	1	80	2	4	0	19	0	44
	7	2	80	2	4	0	6	1
	7	3	80	2	4	0	10	0
	7	4	80	2	4	0	9	0
7.04.2018	8	1	80	1	4	1	9	2	21		31.5	69.5
	8	2	80	1	4	1	2	1
	8	3	80	1	4	1	5	0
	8	4	80	1	4	1	5	0
	8	1	80	2	1	0	27	1	61
	8	2	80	2	1	0	20	0
	8	3	80	2	1	0	8	2
	8	4	80	2	1	0	6	2
10.10.2018	9	1	80	1	2	0	19	0	43		26.9	81.6
	9	2	80	1	2	0	12	0
	9	3	80	1	2	0	9	1
	9	4	80	1	2	0	3	1
	9	1	80	2	3	1	2	0	6
	9	2	80	2	3	1	0	0
	9	3	80	2	3	1	3	0
	9	4	80	2	3	1	1	0
12.10.2018	10	1	80	1	3	0	21	3	43		27.3	68.7
	10	2	80	1	3	0	15	0
	10	3	80	1	3	0	5	1
	10	4	80	1	3	0	2	1
	10	1	80	2	2	1	8	0	13
	10	2	80	2	2	1	4	1
	10	3	80	2	2	1	1	0
	10	4	80	2	2	1	0	0
13.10.2018	11	1	80	1	1	0	19	1	47		27.7	73.2
	11	2	80	1	1	0	12	0
	11	3	80	1	1	0	10	0
	11	4	80	1	1	0	6	1
	11	1	80	2	4	1	5	0	14
	11	2	80	2	4	1	0	0
	11	3	80	2	4	1	7	1
	11	4	80	2	4	1	2	0
14.10.2018	12	1	80	1	4	0	16	6	53		27.1	79.3
	12	2	80	1	4	0	19	1
	12	3	80	1	4	0	9	2
	12	4	80	1	4	0	9	0
	12	1	80	2	1	1	7	2	26
	12	2	80	2	1	1	0	0
	12	3	80	2	1	1	6	0
	12	4	80	2	1	1	13	1
15.10.2018	13	1	80	1	2	1	11	0	23		27.5	77.7
	13	2	80	1	2	1	2	0
	13	3	80	1	2	1	6	1
	13	4	80	1	2	1	4	2
	13	1	80	2	3	0	23	0	46
	13	2	80	2	3	0	12	0
	13	3	80	2	3	0	7	0
	13	4	80	2	3	0	4	0
16.10.2018	14	1	80	1	3	1	7	2	25		28.2	82.2
	14	2	80	1	3	1	12	0
	14	3	80	1	3	1	3	1
	14	4	80	1	3	1	3	0
	14	1	80	2	2	0	17	3	45
	14	2	80	2	2	0	12	0
	14	3	80	2	2	0	9	1
	14	4	80	2	2	0	7	1
18.10.2018	15	1	80	1	1	1	13	0	24		28.2	87
	15	2	80	1	1	1	5	0
	15	3	80	1	1	1	5	2
	15	4	80	1	1	1	1	0
	15	1	80	2	4	0	18	3	44
	15	2	80	2	4	0	15	0
	15	3	80	2	4	0	6	1
	15	4	80	2	4	0	5	0
20.10.2018	16	1	80	1	4	1	7	2	18		29.9	76
	16	2	80	1	4	1	2	0
	16	3	80	1	4	1	4	1
	16	4	80	1	4	1	5	1
	16	1	80	2	1	0	27	3	49
	16	2	80	2	1	0	14	2
	16	3	80	2	1	0	6	1
	16	4	80	2	1	0	2	3

## Sheet: Definition
Treatment	1= Control
	2= Hessian strip
Volunteer	1=Noel
	2=Chilumba
	3=Hamis
	4= Isaya
Compartment	1= Near black tank
	2= Near animal house
Red cell	failed days
Stains	1=Resistant
	2=Mbita
	3=Gambiae
Intervention	0=Control
	1=Treatmentl

## Sheet: Combined
date	dayafter	strain	day	time	released	compartment	volunteer	intervention	recaptured	mortality	temperature	humidity
25.03.2018	1	0	1	1	80	1	2	0	38	6	30.8	66.6
	1	0	1	2	80	1	2	0	20	4	30.8	66.6
	1	0	1	3	80	1	2	0	13	0	30.8	66.6
	1	0	1	4	80	1	2	0	5	2	30.8	66.6
	1	0	1	1	80	2	3	1	18	3	30.8	66.6
	1	0	1	2	80	2	3	1	4	2	30.8	66.6
	1	0	1	3	80	2	3	1	3	0	30.8	66.6
	1	0	1	4	80	2	3	1	4	0	30.8	66.6
26.03.2018	2	0	2	1	80	1	3	0	23	0	29.2	76
	2	0	2	2	80	1	3	0	14	1	29.2	76
	2	0	2	3	80	1	3	0	23	0	29.2	76
	2	0	2	4	80	1	3	0	4	0	29.2	76
	2	0	2	1	80	2	2	1	10	0	29.2	76
	2	0	2	2	80	2	2	1	2	0	29.2	76
	2	0	2	3	80	2	2	1	4	0	29.2	76
	2	0	2	4	80	2	2	1	0	0	29.2	76
2018-04-02	7	0	3	1	80	1	1	0	27	5	30.4	67.4
	7	0	3	2	80	1	1	0	12	5	30.4	67.4
	7	0	3	3	80	1	1	0	26	6	30.4	67.4
	7	0	3	4	80	1	1	0	5	0	30.4	67.4
	7	0	3	1	80	2	4	1	9	4	30.4	67.4
	7	0	3	2	80	2	4	1	5	1	30.4	67.4
	7	0	3	3	80	2	4	1	16	1	30.4	67.4
	7	0	3	4	80	2	4	1	4	0	30.4	67.4
3.04.2018	8	0	4	1	80	1	4	0	26	3	25.4	92
	8	0	4	2	80	1	4	0	11	1	25.4	92
	8	0	4	3	80	1	4	0	19	3	25.4	92
	8	0	4	4	80	1	4	0	13	0	25.4	92
	8	0	4	1	80	2	1	1	4	0	25.4	92
	8	0	4	2	80	2	1	1	5	1	25.4	92
	8	0	4	3	80	2	1	1	1	1	25.4	92
	8	0	4	4	80	2	1	1	7	0	25.4	92
4.04.2018	9	0	5	1	80	1	2	1	9	1	27.6	81.3
	9	0	5	2	80	1	2	1	1	0	27.6	81.3
	9	0	5	3	80	1	2	1	2	1	27.6	81.3
	9	0	5	4	80	1	2	1	0	0	27.6	81.3
	9	0	5	1	80	2	3	0	26	5	27.6	81.3
	9	0	5	2	80	2	3	0	12	2	27.6	81.3
	9	0	5	3	80	2	3	0	9	3	27.6	81.3
	9	0	5	4	80	2	3	0	11	1	27.6	81.3
5.04.2018	10	0	6	1	80	1	3	1	10	0	28	80.5
	10	0	6	2	80	1	3	1	5	0	28	80.5
	10	0	6	3	80	1	3	1	8	0	28	80.5
	10	0	6	4	80	1	3	1	2	0	28	80.5
	10	0	6	1	80	2	2	0	26	6	28	80.5
	10	0	6	2	80	2	2	0	18	0	28	80.5
	10	0	6	3	80	2	2	0	11	0	28	80.5
	10	0	6	4	80	2	2	0	10	1	28	80.5
6.04.2018	11	0	7	1	80	1	1	1	4	0	29.5	80
	11	0	7	2	80	1	1	1	3	2	29.5	80
	11	0	7	3	80	1	1	1	2	0	29.5	80
	11	0	7	4	80	1	1	1	3	1	29.5	80
	11	0	7	1	80	2	4	0	25	4	29.5	80
	11	0	7	2	80	2	4	0	6	1	29.5	80
	11	0	7	3	80	2	4	0	8	2	29.5	80
	11	0	7	4	80	2	4	0	4	0	29.5	80
7.04.2018	12	0	8	1	80	1	4	1	3	0	31.5	69.5
	12	0	8	2	80	1	4	1	4	1	31.5	69.5
	12	0	8	3	80	1	4	1	1	1	31.5	69.5
	12	0	8	4	80	1	4	1	3	0	31.5	69.5
	12	0	8	1	80	2	1	0	19	2	31.5	69.5
	12	0	8	2	80	2	1	0	15	1	31.5	69.5
	12	0	8	3	80	2	1	0	10	2	31.5	69.5
	12	0	8	4	80	2	1	0	9	1	31.5	69.5
10.10.2018	188	0	9	1	80	1	2	0	17	0	26.9	81.6
	188	0	9	2	80	1	2	0	11	0	26.9	81.6
	188	0	9	3	80	1	2	0	20	1	26.9	81.6
	188	0	9	4	80	1	2	0	19	1	26.9	81.6
	188	0	9	1	80	2	3	1	8	0	26.9	81.6
	188	0	9	2	80	2	3	1	2	0	26.9	81.6
	188	0	9	3	80	2	3	1	6	0	26.9	81.6
	188	0	9	4	80	2	3	1	3	0	26.9	81.6
12.10.2018	190	0	10	1	80	1	3	0	39	0	27.3	68.7
	190	0	10	2	80	1	3	0	18	1	27.3	68.7
	190	0	10	3	80	1	3	0	9	4	27.3	68.7
	190	0	10	4	80	1	3	0	7	0	27.3	68.7
	190	0	10	1	80	2	2	1	11	5	27.3	68.7
	190	0	10	2	80	2	2	1	4	0	27.3	68.7
	190	0	10	3	80	2	2	1	1	0	27.3	68.7
	190	0	10	4	80	2	2	1	2	0	27.3	68.7
13.10.2018	191	0	11	1	80	1	1	0	37	6	27.7	73.2
	191	0	11	2	80	1	1	0	12	2	27.7	73.2
	191	0	11	3	80	1	1	0	9	1	27.7	73.2
	191	0	11	4	80	1	1	0	4	0	27.7	73.2
	191	0	11	1	80	2	4	1	4	0	27.7	73.2
	191	0	11	2	80	2	4	1	4	1	27.7	73.2
	191	0	11	3	80	2	4	1	7	1	27.7	73.2
	191	0	11	4	80	2	4	1	4	0	27.7	73.2
14.10.2018	192	0	12	1	80	1	4	0	16	6	27.1	79.3
	192	0	12	2	80	1	4	0	19	1	27.1	79.3
	192	0	12	3	80	1	4	0	28	2	27.1	79.3
	192	0	12	4	80	1	4	0	6	0	27.1	79.3
	192	0	12	1	80	2	1	1	11	2	27.1	79.3
	192	0	12	2	80	2	1	1	0	0	27.1	79.3
	192	0	12	3	80	2	1	1	7	0	27.1	79.3
	192	0	12	4	80	2	1	1	7	1	27.1	79.3
15.10.2018	193	0	13	1	80	1	2	1	22	7	27.5	77.7
	193	0	13	2	80	1	2	1	4	1	27.5	77.7
	193	0	13	3	80	1	2	1	4	0	27.5	77.7
	193	0	13	4	80	1	2	1	5	2	27.5	77.7
	193	0	13	1	80	2	3	0	31	2	27.5	77.7
	193	0	13	2	80	2	3	0	9	2	27.5	77.7
	193	0	13	3	80	2	3	0	10	1	27.5	77.7
	193	0	13	4	80	2	3	0	8	0	27.5	77.7
16.10.2018	194	0	14	1	80	1	3	1	9	5	28.2	82.2
	194	0	14	2	80	1	3	1	11	0	28.2	82.2
	194	0	14	3	80	1	3	1	8	0	28.2	82.2
	194	0	14	4	80	1	3	1	7	4	28.2	82.2
	194	0	14	1	80	2	2	0	23	4	28.2	82.2
	194	0	14	2	80	2	2	0	15	0	28.2	82.2
	194	0	14	3	80	2	2	0	8	0	28.2	82.2
	194	0	14	4	80	2	2	0	5	5	28.2	82.2
18.10.2018	196	0	15	1	80	1	1	1	4	1	28.2	87
	196	0	15	2	80	1	1	1	9	0	28.2	87
	196	0	15	3	80	1	1	1	3	0	28.2	87
	196	0	15	4	80	1	1	1	3	0	28.2	87
	196	0	15	1	80	2	4	0	26	0	28.2	87
	196	0	15	2	80	2	4	0	11	0	28.2	87
	196	0	15	3	80	2	4	0	9	0	28.2	87
	196	0	15	4	80	2	4	0	4	0	28.2	87
20.10.2018	198	0	16	1	80	1	4	1	9	1	29.9	76
	198	0	16	2	80	1	4	1	3	2	29.9	76
	198	0	16	3	80	1	4	1	0	0	29.9	76
	198	0	16	4	80	1	4	1	3	0	29.9	76
	198	0	16	1	80	2	1	0	17	3	29.9	76
	198	0	16	2	80	2	1	0	22	0	29.9	76
	198	0	16	3	80	2	1	0	8	2	29.9	76
	198	0	16	4	80	2	1	0	5	2	29.9	76
25.03.2018	1	1	17	1	80	1	2	0	27	2	30.8	66.6
	1	1	17	2	80	1	2	0	9	0	30.8	66.6
	1	1	17	3	80	1	2	0	3	1	30.8	66.6
	1	1	17	4	80	1	2	0	2	0	30.8	66.6
	1	1	17	1	80	2	3	1	6	2	30.8	66.6
	1	1	17	2	80	2	3	1	2	0	30.8	66.6
	1	1	17	3	80	2	3	1	2	0	30.8	66.6
	1	1	17	4	80	2	3	1	2	0	30.8	66.6
26.03.2018	2	1	18	1	80	1	3	0	4	0	29.2	76
	2	1	18	2	80	1	3	0	11	1	29.2	76
	2	1	18	3	80	1	3	0	15	0	29.2	76
	2	1	18	4	80	1	3	0	12	0	29.2	76
	2	1	18	1	80	2	2	1	1	0	29.2	76
	2	1	18	2	80	2	2	1	6	0	29.2	76
	2	1	18	3	80	2	2	1	0	0	29.2	76
	2	1	18	4	80	2	2	1	1	0	29.2	76
2018-04-02	7	1	19	1	80	1	1	0	19	0	30.4	67.4
	7	1	19	2	80	1	1	0	6	0	30.4	67.4
	7	1	19	3	80	1	1	0	14	0	30.4	67.4
	7	1	19	4	80	1	1	0	3	0	30.4	67.4
	7	1	19	1	80	2	4	1	4	1	30.4	67.4
	7	1	19	2	80	2	4	1	0	0	30.4	67.4
	7	1	19	3	80	2	4	1	9	0	30.4	67.4
	7	1	19	4	80	2	4	1	1	0	30.4	67.4
3.04.2018	8	1	20	1	80	1	4	0	21	0	25.4	92
	8	1	20	2	80	1	4	0	8	0	25.4	92
	8	1	20	3	80	1	4	0	14	0	25.4	92
	8	1	20	4	80	1	4	0	12	1	25.4	92
	8	1	20	1	80	2	1	1	1	0	25.4	92
	8	1	20	2	80	2	1	1	2	0	25.4	92
	8	1	20	3	80	2	1	1	5	0	25.4	92
	8	1	20	4	80	2	1	1	4	0	25.4	92
4.04.2018	9	1	21	1	80	1	2	1	21	1	27.6	81.3
	9	1	21	2	80	1	2	1	0	0	27.6	81.3
	9	1	21	3	80	1	2	1	5	0	27.6	81.3
	9	1	21	4	80	1	2	1	3	0	27.6	81.3
	9	1	21	1	80	2	3	0	24	3	27.6	81.3
	9	1	21	2	80	2	3	0	10	0	27.6	81.3
	9	1	21	3	80	2	3	0	3	0	27.6	81.3
	9	1	21	4	80	2	3	0	11	0	27.6	81.3
5.04.2018	10	1	22	1	80	1	3	1	2	1	28	80.5
	10	1	22	2	80	1	3	1	0	0	28	80.5
	10	1	22	3	80	1	3	1	3	0	28	80.5
	10	1	22	4	80	1	3	1	1	0	28	80.5
	10	1	22	1	80	2	2	0	12	2	28	80.5
	10	1	22	2	80	2	2	0	14	0	28	80.5
	10	1	22	3	80	2	2	0	16	1	28	80.5
	10	1	22	4	80	2	2	0	2	1	28	80.5
6.04.2018	11	1	23	1	80	1	1	1	1	0	29.5	80
	11	1	23	2	80	1	1	1	3	0	29.5	80
	11	1	23	3	80	1	1	1	1	0	29.5	80
	11	1	23	4	80	1	1	1	4	0	29.5	80
	11	1	23	1	80	2	4	0	18	0	29.5	80
	11	1	23	2	80	2	4	0	13	0	29.5	80
	11	1	23	3	80	2	4	0	11	1	29.5	80
	11	1	23	4	80	2	4	0	2	1	29.5	80
7.04.2018	12	1	24	1	80	1	4	1	5	1	31.5	69.5
	12	1	24	2	80	1	4	1	2	0	31.5	69.5
	12	1	24	3	80	1	4	1	6	2	31.5	69.5
	12	1	24	4	80	1	4	1	2	0	31.5	69.5
	12	1	24	1	80	2	1	0	20	0	31.5	69.5
	12	1	24	2	80	2	1	0	10	0	31.5	69.5
	12	1	24	3	80	2	1	0	4	1	31.5	69.5
	12	1	24	4	80	2	1	0	5	1	31.5	69.5
10.10.2018	188	1	25	1	80	1	2	0	13	3	26.9	81.6
	188	1	25	2	80	1	2	0	9	0	26.9	81.6
	188	1	25	3	80	1	2	0	10	1	26.9	81.6
	188	1	25	4	80	1	2	0	11	1	26.9	81.6
	188	1	25	1	80	2	3	1	4	0	26.9	81.6
	188	1	25	2	80	2	3	1	1	0	26.9	81.6
	188	1	25	3	80	2	3	1	2	1	26.9	81.6
	188	1	25	4	80	2	3	1	2	0	26.9	81.6
12.10.2018	190	1	26	1	80	1	3	0	25	3	27.3	68.7
	190	1	26	2	80	1	3	0	13	0	27.3	68.7
	190	1	26	3	80	1	3	0	4	1	27.3	68.7
	190	1	26	4	80	1	3	0	2	1	27.3	68.7
	190	1	26	1	80	2	2	1	15	0	27.3	68.7
	190	1	26	2	80	2	2	1	1	1	27.3	68.7
	190	1	26	3	80	2	2	1	1	0	27.3	68.7
	190	1	26	4	80	2	2	1	0	0	27.3	68.7
13.10.2018	191	1	27	1	80	1	1	0	22	3	27.7	73.2
	191	1	27	2	80	1	1	0	11	0	27.7	73.2
	191	1	27	3	80	1	1	0	5	0	27.7	73.2
	191	1	27	4	80	1	1	0	6	1	27.7	73.2
	191	1	27	1	80	2	4	1	2	2	27.7	73.2
	191	1	27	2	80	2	4	1	1	0	27.7	73.2
	191	1	27	3	80	2	4	1	0	0	27.7	73.2
	191	1	27	4	80	2	4	1	0	0	27.7	73.2
14.10.2018	192	1	28	1	80	1	4	0	20	5	27.1	79.3
	192	1	28	2	80	1	4	0	13	2	27.1	79.3
	192	1	28	3	80	1	4	0	10	0	27.1	79.3
	192	1	28	4	80	1	4	0	3	0	27.1	79.3
	192	1	28	1	80	2	1	1	2	2	27.1	79.3
	192	1	28	2	80	2	1	1	0	0	27.1	79.3
	192	1	28	3	80	2	1	1	8	0	27.1	79.3
	192	1	28	4	80	2	1	1	1	0	27.1	79.3
15.10.2018	193	1	29	1	80	1	2	1	13	4	27.5	77.7
	193	1	29	2	80	1	2	1	7	0	27.5	77.7
	193	1	29	3	80	1	2	1	6	1	27.5	77.7
	193	1	29	4	80	1	2	1	5	0	27.5	77.7
	193	1	29	1	80	2	3	0	19	3	27.5	77.7
	193	1	29	2	80	2	3	0	14	1	27.5	77.7
	193	1	29	3	80	2	3	0	6	0	27.5	77.7
	193	1	29	4	80	2	3	0	2	0	27.5	77.7
16.10.2018	194	1	30	1	80	1	3	1	14	1	28.2	82.2
	194	1	30	2	80	1	3	1	2	0	28.2	82.2
	194	1	30	3	80	1	3	1	2	0	28.2	82.2
	194	1	30	4	80	1	3	1	6	2	28.2	82.2
	194	1	30	1	80	2	2	0	21	5	28.2	82.2
	194	1	30	2	80	2	2	0	4	1	28.2	82.2
	194	1	30	3	80	2	2	0	7	1	28.2	82.2
	194	1	30	4	80	2	2	0	9	2	28.2	82.2
18.10.2018	196	1	31	1	80	1	1	1	7	1	28.2	87
	196	1	31	2	80	1	1	1	3	0	28.2	87
	196	1	31	3	80	1	1	1	4	0	28.2	87
	196	1	31	4	80	1	1	1	2	0	28.2	87
	196	1	31	1	80	2	4	0	16	0	28.2	87
	196	1	31	2	80	2	4	0	19	0	28.2	87
	196	1	31	3	80	2	4	0	5	0	28.2	87
	196	1	31	4	80	2	4	0	2	0	28.2	87
20.10.2018	198	1	32	1	80	1	4	1	7	2	29.9	76
	198	1	32	2	80	1	4	1	1	0	29.9	76
	198	1	32	3	80	1	4	1	0	1	29.9	76
	198	1	32	4	80	1	4	1	0	1	29.9	76
	198	1	32	1	80	2	1	0	19	3	29.9	76
	198	1	32	2	80	2	1	0	9	2	29.9	76
	198	1	32	3	80	2	1	0	9	1	29.9	76
	198	1	32	4	80	2	1	0	4	3	29.9	76
25.03.2018	1	2	33	1	80	1	2	0	25	3	30.8	66.6
	1	2	33	2	80	1	2	0	14	0	30.8	66.6
	1	2	33	3	80	1	2	0	8	1	30.8	66.6
	1	2	33	4	80	1	2	0	5	0	30.8	66.6
	1	2	33	1	80	2	3	1	10	3	30.8	66.6
	1	2	33	2	80	2	3	1	8	1	30.8	66.6
	1	2	33	3	80	2	3	1	6	2	30.8	66.6
	1	2	33	4	80	2	3	1	3	0	30.8	66.6
26.03.2018	2	2	34	1	80	1	3	0	11	1	29.2	76
	2	2	34	2	80	1	3	0	9	1	29.2	76
	2	2	34	3	80	1	3	0	13	0	29.2	76
	2	2	34	4	80	1	3	0	8	0	29.2	76
	2	2	34	1	80	2	2	1	5	1	29.2	76
	2	2	34	2	80	2	2	1	3	0	29.2	76
	2	2	34	3	80	2	2	1	2	0	29.2	76
	2	2	34	4	80	2	2	1	3	0	29.2	76
2018-04-02	7	2	35	1	80	1	1	0	21	1	30.4	67.4
	7	2	35	2	80	1	1	0	8	1	30.4	67.4
	7	2	35	3	80	1	1	0	18	0	30.4	67.4
	7	2	35	4	80	1	1	0	1	0	30.4	67.4
	7	2	35	1	80	2	4	1	15	1	30.4	67.4
	7	2	35	2	80	2	4	1	2	0	30.4	67.4
	7	2	35	3	80	2	4	1	11	2	30.4	67.4
	7	2	35	4	80	2	4	1	1	0	30.4	67.4
3.04.2018	8	2	36	1	80	1	4	0	16	0	25.4	92
	8	2	36	2	80	1	4	0	6	0	25.4	92
	8	2	36	3	80	1	4	0	14	0	25.4	92
	8	2	36	4	80	1	4	0	10	0	25.4	92
	8	2	36	1	80	2	1	1	21	4	25.4	92
	8	2	36	2	80	2	1	1	6	0	25.4	92
	8	2	36	3	80	2	1	1	6	4	25.4	92
	8	2	36	4	80	2	1	1	5	1	25.4	92
4.04.2018	9	2	37	1	80	1	2	1	29	1	27.6	81.3
	9	2	37	2	80	1	2	1	4	1	27.6	81.3
	9	2	37	3	80	1	2	1	9	0	27.6	81.3
	9	2	37	4	80	1	2	1	1	0	27.6	81.3
	9	2	37	1	80	2	3	0	19	1	27.6	81.3
	9	2	37	2	80	2	3	0	20	0	27.6	81.3
	9	2	37	3	80	2	3	0	6	2	27.6	81.3
	9	2	37	4	80	2	3	0	15	1	27.6	81.3
5.04.2018	10	2	38	1	80	1	3	1	6	3	28	80.5
	10	2	38	2	80	1	3	1	0	0	28	80.5
	10	2	38	3	80	1	3	1	1	1	28	80.5
	10	2	38	4	80	1	3	1	2	0	28	80.5
	10	2	38	1	80	2	2	0	30	1	28	80.5
	10	2	38	2	80	2	2	0	11	0	28	80.5
	10	2	38	3	80	2	2	0	5	0	28	80.5
	10	2	38	4	80	2	2	0	6	0	28	80.5
6.04.2018	11	2	39	1	80	1	1	1	6	2	29.5	80
	11	2	39	2	80	1	1	1	5	0	29.5	80
	11	2	39	3	80	1	1	1	2	0	29.5	80
	11	2	39	4	80	1	1	1	5	1	29.5	80
	11	2	39	1	80	2	4	0	19	0	29.5	80
	11	2	39	2	80	2	4	0	6	1	29.5	80
	11	2	39	3	80	2	4	0	10	0	29.5	80
	11	2	39	4	80	2	4	0	9	0	29.5	80
7.04.2018	12	2	40	1	80	1	4	1	9	2	31.5	69.5
	12	2	40	2	80	1	4	1	2	1	31.5	69.5
	12	2	40	3	80	1	4	1	5	0	31.5	69.5
	12	2	40	4	80	1	4	1	5	0	31.5	69.5
	12	2	40	1	80	2	1	0	27	1	31.5	69.5
	12	2	40	2	80	2	1	0	20	0	31.5	69.5
	12	2	40	3	80	2	1	0	8	2	31.5	69.5
	12	2	40	4	80	2	1	0	6	2	31.5	69.5
10.10.2018	188	2	41	1	80	1	2	0	19	0	26.9	81.6
	188	2	41	2	80	1	2	0	12	0	26.9	81.6
	188	2	41	3	80	1	2	0	9	1	26.9	81.6
	188	2	41	4	80	1	2	0	3	1	26.9	81.6
	188	2	41	1	80	2	3	1	2	0	26.9	81.6
	188	2	41	2	80	2	3	1	0	0	26.9	81.6
	188	2	41	3	80	2	3	1	3	0	26.9	81.6
	188	2	41	4	80	2	3	1	1	0	26.9	81.6
12.10.2018	190	2	42	1	80	1	3	0	21	3	27.3	68.7
	190	2	42	2	80	1	3	0	15	0	27.3	68.7
	190	2	42	3	80	1	3	0	5	1	27.3	68.7
	190	2	42	4	80	1	3	0	2	1	27.3	68.7
	190	2	42	1	80	2	2	1	8	0	27.3	68.7
	190	2	42	2	80	2	2	1	4	1	27.3	68.7
	190	2	42	3	80	2	2	1	1	0	27.3	68.7
	190	2	42	4	80	2	2	1	0	0	27.3	68.7
13.10.2018	191	2	43	1	80	1	1	0	19	1	27.7	73.2
	191	2	43	2	80	1	1	0	12	0	27.7	73.2
	191	2	43	3	80	1	1	0	10	0	27.7	73.2
	191	2	43	4	80	1	1	0	6	1	27.7	73.2
	191	2	43	1	80	2	4	1	5	0	27.7	73.2
	191	2	43	2	80	2	4	1	0	0	27.7	73.2
	191	2	43	3	80	2	4	1	7	1	27.7	73.2
	191	2	43	4	80	2	4	1	2	0	27.7	73.2
14.10.2018	192	2	44	1	80	1	4	0	16	6	27.1	79.3
	192	2	44	2	80	1	4	0	19	1	27.1	79.3
	192	2	44	3	80	1	4	0	9	2	27.1	79.3
	192	2	44	4	80	1	4	0	9	0	27.1	79.3
	192	2	44	1	80	2	1	1	7	2	27.1	79.3
	192	2	44	2	80	2	1	1	0	0	27.1	79.3
	192	2	44	3	80	2	1	1	6	0	27.1	79.3
	192	2	44	4	80	2	1	1	13	1	27.1	79.3
15.10.2018	193	2	45	1	80	1	2	1	11	0	27.5	77.7
	193	2	45	2	80	1	2	1	2	0	27.5	77.7
	193	2	45	3	80	1	2	1	6	1	27.5	77.7
	193	2	45	4	80	1	2	1	4	2	27.5	77.7
	193	2	45	1	80	2	3	0	23	0	27.5	77.7
	193	2	45	2	80	2	3	0	12	0	27.5	77.7
	193	2	45	3	80	2	3	0	7	0	27.5	77.7
	193	2	45	4	80	2	3	0	4	0	27.5	77.7
16.10.2018	194	2	46	1	80	1	3	1	7	2	28.2	82.2
	194	2	46	2	80	1	3	1	12	0	28.2	82.2
	194	2	46	3	80	1	3	1	3	1	28.2	82.2
	194	2	46	4	80	1	3	1	3	0	28.2	82.2
	194	2	46	1	80	2	2	0	17	3	28.2	82.2
	194	2	46	2	80	2	2	0	12	0	28.2	82.2
	194	2	46	3	80	2	2	0	9	1	28.2	82.2
	194	2	46	4	80	2	2	0	7	1	28.2	82.2
18.10.2018	196	2	47	1	80	1	1	1	13	0	28.2	87
	196	2	47	2	80	1	1	1	5	0	28.2	87
	196	2	47	3	80	1	1	1	5	2	28.2	87
	196	2	47	4	80	1	1	1	1	0	28.2	87
	196	2	47	1	80	2	4	0	18	3	28.2	87
	196	2	47	2	80	2	4	0	15	0	28.2	87
	196	2	47	3	80	2	4	0	6	1	28.2	87
	196	2	47	4	80	2	4	0	5	0	28.2	87
20.10.2018	198	2	48	1	80	1	4	1	7	2	29.9	76
	198	2	48	2	80	1	4	1	2	0	29.9	76
	198	2	48	3	80	1	4	1	4	1	29.9	76
	198	2	48	4	80	1	4	1	5	1	29.9	76
	198	2	48	1	80	2	1	0	27	3	29.9	76
	198	2	48	2	80	2	1	0	14	2	29.9	76
	198	2	48	3	80	2	1	0	6	1	29.9	76
	198	2	48	4	80	2	1	0	2	3	29.9	76
