# Supplementary material for: Transfluthrin eave-positioned targeted insecticide (EPTI) reduces human landing rate (HLR) of pyrethroid resistant and susceptible malaria vectors in a semi-field simulated peridomestic space
Source: Malar J. 2021 Aug 30;20:357. doi: 10.1186/s12936-021-03880-2 (PMC8404287; doi:10.1186/s12936-021-03880-2)
Supplement: Supplementary file 3 — Additional file 3. Dataset for the evaluation of EC EPTI against Kisumu susceptible strain and Kisumu KDR strain that support the conclusion of this article. [file 12936_2021_3880_MOESM3_ESM.xlsx]

## Sheet: Combined
date	dayafter	strain	day	time	released	compartment	volunteer	intervention	recaptured	total	24-mortality	temperature	humidity
18.09.2019	1	0	1	1	80	1	1	0	14		0	27.2	72.4
	1	0	1	2	80	1	1	0	9		0	27.2	72.4
	1	0	1	3	80	1	1	0	16		0	27.2	72.4
	1	0	1	4	80	1	1	0	1	40	0	27.2	72.4
	1	0	1	1	80	2	4	1	2		0	27.2	72.4
	1	0	1	2	80	2	4	1	0		0	27.2	72.4
	1	0	1	3	80	2	4	1	1		0	27.2	72.4
	1	0	1	4	80	2	4	1	1	4	0	27.2	72.4
19.09.2019	2	0	2	1	80	1	4	0	17		1	26.2	72.4
	2	0	2	2	80	1	4	0	11		1	26.2	72.4
	2	0	2	3	80	1	4	0	4		0	26.2	72.4
	2	0	2	4	80	1	4	0	9	41	0	26.2	72.4
	2	0	2	1	80	2	1	1	0		0	26.2	72.4
	2	0	2	2	80	2	1	1	0		0	26.2	72.4
	2	0	2	3	80	2	1	1	1		0	26.2	72.4
	2	0	2	4	80	2	1	1	1	2	0	26.2	72.4
20.09.2019	3	0	3	1	80	1	2	0	21		0	27.6	69.8
	3	0	3	2	80	1	2	0	9		0	27.6	69.8
	3	0	3	3	80	1	2	0	7		0	27.6	69.8
	3	0	3	4	80	1	2	0	3	40	0	27.6	69.8
	3	0	3	1	80	2	3	1	2		0	27.6	69.8
	3	0	3	2	80	2	3	1	5		0	27.6	69.8
	3	0	3	3	80	2	3	1	0		0	27.6	69.8
	3	0	3	4	80	2	3	1	7	14	1	27.6	69.8
21.09.2019	4	0	4	1	80	1	3	0	17		0	26.6	71.6
	4	0	4	2	80	1	3	0	18		1	26.6	71.6
	4	0	4	3	80	1	3	0	5		0	26.6	71.6
	4	0	4	4	80	1	3	0	1	41	0	26.6	71.6
	4	0	4	1	80	2	2	1	7		0	26.6	71.6
	4	0	4	2	80	2	2	1	0		0	26.6	71.6
	4	0	4	3	80	2	2	1	1		0	26.6	71.6
	4	0	4	4	80	2	2	1	4	12	0	26.6	71.6
22.09.2019	5	0	5	1	80	1	4	1	6		0	26.6	71.4
	5	0	5	2	80	1	4	1	3		0	26.6	71.4
	5	0	5	3	80	1	4	1	1		0	26.6	71.4
	5	0	5	4	80	1	4	1	8	18	0	26.6	71.4
	5	0	5	1	80	2	1	0	19		0	26.6	71.4
	5	0	5	2	80	2	1	0	11		0	26.6	71.4
	5	0	5	3	80	2	1	0	5		0	26.6	71.4
	5	0	5	4	80	2	1	0	5	40	0	26.6	71.4
23.09.2019	6	0	6	1	80	1	1	1	2		0	26.3	73.8
	6	0	6	2	80	1	1	1	0		0	26.3	73.8
	6	0	6	3	80	1	1	1	4		0	26.3	73.8
	6	0	6	4	80	1	1	1	2	8	0	26.3	73.8
	6	0	6	1	80	2	4	0	13		0	26.3	73.8
	6	0	6	2	80	2	4	0	9		0	26.3	73.8
	6	0	6	3	80	2	4	0	10		0	26.3	73.8
	6	0	6	4	80	2	4	0	8	40	0	26.3	73.8
24.09.2019	7	0	7	1	80	1	2	1	0		0	28.1	79.4
	7	0	7	2	80	1	2	1	2		0	28.1	79.4
	7	0	7	3	80	1	2	1	7		1	28.1	79.4
	7	0	7	4	80	1	2	1	12	21	0	28.1	79.4
	7	0	7	1	80	2	3	0	13		2	28.1	79.4
	7	0	7	2	80	2	3	0	16		0	28.1	79.4
	7	0	7	3	80	2	3	0	10		0	28.1	79.4
	7	0	7	4	80	2	3	0	2	41	0	28.1	79.4
25.09.2019	8	0	8	1	80	1	3	1	5		0	23.8	88.7
	8	0	8	2	80	1	3	1	1		0	23.8	88.7
	8	0	8	3	80	1	3	1	3		0	23.8	88.7
	8	0	8	4	80	1	3	1	6	15	0	23.8	88.7
	8	0	8	1	80	2	2	0	13		0	23.8	88.7
	8	0	8	2	80	2	2	0	24		2	23.8	88.7
	8	0	8	3	80	2	2	0	1		0	23.8	88.7
	8	0	8	4	80	2	2	0	2	40	0	23.8	88.7
26.09.2019	9	0	9	1	80	1	1	0	16		0	27.4	63.6
	9	0	9	2	80	1	1	0	13		1	27.4	63.6
	9	0	9	3	80	1	1	0	5		0	27.4	63.6
	9	0	9	4	80	1	1	0	6	40	0	27.4	63.6
	9	0	9	1	80	2	4	1	5		1	27.4	63.6
	9	0	9	2	80	2	4	1	3		0	27.4	63.6
	9	0	9	3	80	2	4	1	3		0	27.4	63.6
	9	0	9	4	80	2	4	1	0	11	0	27.4	63.6
27.09.2019	10	0	10	1	80	1	4	0	18		0	26.1	72.4
	10	0	10	2	80	1	4	0	11		0	26.1	72.4
	10	0	10	3	80	1	4	0	12		0	26.1	72.4
	10	0	10	4	80	1	4	0	1	42	0	26.1	72.4
	10	0	10	1	80	2	1	1	3		0	26.1	72.4
	10	0	10	2	80	2	1	1	6		0	26.1	72.4
	10	0	10	3	80	2	1	1	1		0	26.1	72.4
	10	0	10	4	80	2	1	1	1	11	0	26.1	72.4
28.09.2019	11	0	11	1	80	1	2	0	14		0	27.6	72.4
	11	0	11	2	80	1	2	0	18		0	27.6	72.4
	11	0	11	3	80	1	2	0	7		0	27.6	72.4
	11	0	11	4	80	1	2	0	1	40	0	27.6	72.4
	11	0	11	1	80	2	3	1	7		0	27.6	72.4
	11	0	11	2	80	2	3	1	0		0	27.6	72.4
	11	0	11	3	80	2	3	1	1		0	27.6	72.4
	11	0	11	4	80	2	3	1	3	11	0	27.6	72.4
29.09.2019	12	0	12	1	80	1	3	0	19		1	26.8	72.1
	12	0	12	2	80	1	3	0	14		0	26.8	72.1
	12	0	12	3	80	1	3	0	7		0	26.8	72.1
	12	0	12	4	80	1	3	0	0	40	0	26.8	72.1
	12	0	12	1	80	2	2	1	3		0	26.8	72.1
	12	0	12	2	80	2	2	1	0		0	26.8	72.1
	12	0	12	3	80	2	2	1	2		0	26.8	72.1
	12	0	12	4	80	2	2	1	5	10	0	26.8	72.1
30.09.2019	13	0	13	1	80	1	1	1	4		0	27.4	78.9
	13	0	13	2	80	1	1	1	1		0	27.4	78.9
	13	0	13	3	80	1	1	1	3		0	27.4	78.9
	13	0	13	4	80	1	1	1	0	8	0	27.4	78.9
	13	0	13	1	80	2	4	0	19		0	27.4	78.9
	13	0	13	2	80	2	4	0	13		0	27.4	78.9
	13	0	13	3	80	2	4	0	6		0	27.4	78.9
	13	0	13	4	80	2	4	0	2	40	0	27.4	78.9
01.10.2019	14	0	14	1	80	1	4	1	3		0	27.3	80.5
	14	0	14	2	80	1	4	1	2		0	27.3	80.5
	14	0	14	3	80	1	4	1	4		0	27.3	80.5
	14	0	14	4	80	1	4	1	0	9	0	27.3	80.5
	14	0	14	1	80	2	1	0	21		0	27.3	80.5
	14	0	14	2	80	2	1	0	9		0	27.3	80.5
	14	0	14	3	80	2	1	0	7		0	27.3	80.5
	14	0	14	4	80	2	1	0	3	40	0	27.3	80.5
2019-10-02	15	0	15	1	80	1	2	1	3		0	28	79
	15	0	15	2	80	1	2	1	2		0	28	79
	15	0	15	3	80	1	2	1	0		0	28	79
	15	0	15	4	80	1	2	1	0	5	0	28	79
	15	0	15	1	80	2	3	0	15		0	28	79
	15	0	15	2	80	2	3	0	10		0	28	79
	15	0	15	3	80	2	3	0	9		0	28	79
	15	0	15	4	80	2	3	0	6	40	0	28	79
2019-10-03	16	0	16	1	80	1	3	1	2		0	27.6	81
	16	0	16	2	80	1	3	1	2		0	27.6	81
	16	0	16	3	80	1	3	1	3		0	27.6	81
	16	0	16	4	80	1	3	1	0	7	0	27.6	81
	16	0	16	1	80	2	2	0	23		0	27.6	81
	16	0	16	2	80	2	2	0	14		0	27.6	81
	16	0	16	3	80	2	2	0	4		0	27.6	81
	16	0	16	4	80	2	2	0	1	42	0	27.6	81
18.09.2019	1	1	17	1	80	1	1	0	14		0	27.6	72.4
	1	1	17	2	80	1	1	0	9		0	27.6	72.4
	1	1	17	3	80	1	1	0	16		0	27.6	72.4
	1	1	17	4	80	1	1	0	1	40	1	27.6	72.4
	1	1	17	1	80	2	4	1	2		0	27.6	72.4
	1	1	17	2	80	2	4	1	0		0	27.6	72.4
	1	1	17	3	80	2	4	1	1		0	27.6	72.4
	1	1	17	4	80	2	4	1	1	4	0	27.6	72.4
19.09.2019	2	1	18	1	80	1	4	0	17		1	26.2	72.4
	2	1	18	2	80	1	4	0	11		1	26.2	72.4
	2	1	18	3	80	1	4	0	4		0	26.2	72.4
	2	1	18	4	80	1	4	0	9	41	0	26.2	72.4
	2	1	18	1	80	2	1	1	0		0	26.2	72.4
	2	1	18	2	80	2	1	1	0		0	26.2	72.4
	2	1	18	3	80	2	1	1	1		0	26.2	72.4
	2	1	18	4	80	2	1	1	1	2	0	26.2	72.4
20.09.2019	3	1	19	1	80	1	2	0	21		0	27.6	69.8
	3	1	19	2	80	1	2	0	9		0	27.6	69.8
	3	1	19	3	80	1	2	0	7		0	27.6	69.8
	3	1	19	4	80	1	2	0	3	40	0	27.6	69.8
	3	1	19	1	80	2	3	1	2		0	27.6	69.8
	3	1	19	2	80	2	3	1	5		0	27.6	69.8
	3	1	19	3	80	2	3	1	0		0	27.6	69.8
	3	1	19	4	80	2	3	1	7	14	1	27.6	69.8
21.09.2019	4	1	20	1	80	1	3	0	17		0	26.6	71.6
	4	1	20	2	80	1	3	0	18		1	26.6	71.6
	4	1	20	3	80	1	3	0	5		0	26.6	71.6
	4	1	20	4	80	1	3	0	1	41	0	26.6	71.6
	4	1	20	1	80	2	2	1	7		0	26.6	71.6
	4	1	20	2	80	2	2	1	0		0	26.6	71.6
	4	1	20	3	80	2	2	1	1		0	26.6	71.6
	4	1	20	4	80	2	2	1	4	12	0	26.6	71.6
22.09.2019	5	1	21	1	80	1	4	1	6		0	26.6	71.4
	5	1	21	2	80	1	4	1	3		0	26.6	71.4
	5	1	21	3	80	1	4	1	0		0	26.6	71.4
	5	1	21	4	80	1	4	1	8	17	0	26.6	71.4
	5	1	21	1	80	2	1	0	19		0	26.6	71.4
	5	1	21	2	80	2	1	0	11		0	26.6	71.4
	5	1	21	3	80	2	1	0	6		0	26.6	71.4
	5	1	21	4	80	2	1	0	4	40	0	26.6	71.4
23.09.2019	6	1	22	1	80	1	1	1	1		0	26.3	73.8
	6	1	22	2	80	1	1	1	0		0	26.3	73.8
	6	1	22	3	80	1	1	1	4		0	26.3	73.8
	6	1	22	4	80	1	1	1	3	8	0	26.3	73.8
	6	1	22	1	80	2	4	0	13		0	26.3	73.8
	6	1	22	2	80	2	4	0	9		0	26.3	73.8
	6	1	22	3	80	2	4	0	10		0	26.3	73.8
	6	1	22	4	80	2	4	0	9	41	0	26.3	73.8
24.09.2019	7	1	23	1	80	1	2	1	0		0	28.1	79.4
	7	1	23	2	80	1	2	1	2		0	28.1	79.4
	7	1	23	3	80	1	2	1	7		1	28.1	79.4
	7	1	23	4	80	1	2	1	12	21	0	28.1	79.4
	7	1	23	1	80	2	3	0	13		2	28.1	79.4
	7	1	23	2	80	2	3	0	16		0	28.1	79.4
	7	1	23	3	80	2	3	0	10		0	28.1	79.4
	7	1	23	4	80	2	3	0	2	41	0	28.1	79.4
25.09.2019	8	1	24	1	80	1	3	1	5		0	23.8	88.7
	8	1	24	2	80	1	3	1	1		0	23.8	88.7
	8	1	24	3	80	1	3	1	3		0	23.8	88.7
	8	1	24	4	80	1	3	1	6	15	0	23.8	88.7
	8	1	24	1	80	2	2	0	13		0	23.8	88.7
	8	1	24	2	80	2	2	0	24		2	23.8	88.7
	8	1	24	3	80	2	2	0	1		0	23.8	88.7
	8	1	24	4	80	2	2	0	2	40	0	23.8	88.7
26.09.2019	9	1	25	1	80	1	1	0	16		0	27.4	63.6
	9	1	25	2	80	1	1	0	11		1	27.4	63.6
	9	1	25	3	80	1	1	0	7		0	27.4	63.6
	9	1	25	4	80	1	1	0	6	40	0	27.4	63.6
	9	1	25	1	80	2	4	1	5		1	27.4	63.6
	9	1	25	2	80	2	4	1	2		0	27.4	63.6
	9	1	25	3	80	2	4	1	3		0	27.4	63.6
	9	1	25	4	80	2	4	1	0	10	0	27.4	63.6
27.09.2019	10	1	26	1	80	1	4	0	18		0	26.1	72.4
	10	1	26	2	80	1	4	0	11		0	26.1	72.4
	10	1	26	3	80	1	4	0	12		0	26.1	72.4
	10	1	26	4	80	1	4	0	1	42	0	26.1	72.4
	10	1	26	1	80	2	1	1	3		0	26.1	72.4
	10	1	26	2	80	2	1	1	6		0	26.1	72.4
	10	1	26	3	80	2	1	1	1		0	26.1	72.4
	10	1	26	4	80	2	1	1	1	11	0	26.1	72.4
28.09.2019	11	1	27	1	80	1	2	0	14		0	27.6	72.4
	11	1	27	2	80	1	2	0	18		0	27.6	72.4
	11	1	27	3	80	1	2	0	7		0	27.6	72.4
	11	1	27	4	80	1	2	0	1	40	0	27.6	72.4
	11	1	27	1	80	2	3	1	7		0	27.6	72.4
	11	1	27	2	80	2	3	1	0		0	27.6	72.4
	11	1	27	3	80	2	3	1	1		0	27.6	72.4
	11	1	27	4	80	2	3	1	3	11	0	27.6	72.4
29.09.2019	12	1	28	1	80	1	3	0	19		1	26.8	72.1
	12	1	28	2	80	1	3	0	14		0	26.8	72.1
	12	1	28	3	80	1	3	0	7		0	26.8	72.1
	12	1	28	4	80	1	3	0	0	40	0	26.8	72.1
	12	1	28	1	80	2	2	1	3		0	26.8	72.1
	12	1	28	2	80	2	2	1	0		0	26.8	72.1
	12	1	28	3	80	2	2	1	2		0	26.8	72.1
	12	1	28	4	80	2	2	1	5	10	0	26.8	72.1
30.09.2019	13	1	29	1	80	1	1	1	4		0	27.4	78.9
	13	1	29	2	80	1	1	1	1		0	27.4	78.9
	13	1	29	3	80	1	1	1	3		0	27.4	78.9
	13	1	29	4	80	1	1	1	0	8	0	27.4	78.9
	13	1	29	1	80	2	4	0	19		0	27.4	78.9
	13	1	29	2	80	2	4	0	13		0	27.4	78.9
	13	1	29	3	80	2	4	0	6		0	27.4	78.9
	13	1	29	4	80	2	4	0	2	40	0	27.4	78.9
01.10.2019	14	1	30	1	80	1	4	1	3		0	27.3	80.5
	14	1	30	2	80	1	4	1	1		0	27.3	80.5
	14	1	30	3	80	1	4	1	4		0	27.3	80.5
	14	1	30	4	80	1	4	1	0	8	0	27.3	80.5
	14	1	30	1	80	2	1	0	21		0	27.3	80.5
	14	1	30	2	80	2	1	0	9		0	27.3	80.5
	14	1	30	3	80	2	1	0	8		0	27.3	80.5
	14	1	30	4	80	2	1	0	2	40	0	27.3	80.5
2019-10-02	15	1	31	1	80	1	2	1	2		0	28	79
	15	1	31	2	80	1	2	1	2		0	28	79
	15	1	31	3	80	1	2	1	2		0	28	79
	15	1	31	4	80	1	2	1	0	6	0	28	79
	15	1	31	1	80	2	3	0	15		0	28	79
	15	1	31	2	80	2	3	0	10		0	28	79
	15	1	31	3	80	2	3	0	8		0	28	79
	15	1	31	4	80	2	3	0	7	40	0	28	79
2019-10-03	16	1	32	1	80	1	3	1	2		0	27.6	81
	16	1	32	2	80	1	3	1	2		0	27.6	81
	16	1	32	3	80	1	3	1	3		0	27.6	81
	16	1	32	4	80	1	3	1	0	7	0	27.6	81
	16	1	32	1	80	2	2	0	23		0	27.6	81
	16	1	32	2	80	2	2	0	14		0	27.6	81
	16	1	32	3	80	2	2	0	4		0	27.6	81
	16	1	32	4	80	2	2	0	1	42	0	27.6	81
